# Supplementary material
Source: PubMed Central journal article supplement (PMC6905224)
Supplement: plantbiotechnology-35-4-18.0824a-s001.pdf [file plantbiotechnology-35-4-18.0824a-s001.pdf]

Table S1. Primers used in this study

| Primers           | Sequences (5'→3')            |
|-------------------|------------------------------|
| <i>pBI121</i>     | F: TGATGTGATATCTCCACTGACGTAA |
|                   | R: TTCTACAGGACGTAACATAAGGGAC |
| <i>BjuACTIN2</i>  | F: GCTGACCGTATGAGCAAAGA      |
|                   | R: GTTGGAAAGTGCTGAGGGAT      |
| <i>BjuSOC1</i>    | F: TGAGTTCGCCAGCTCCAATAT     |
|                   | R: GCCTTCTCCCAAGAGTTTACGT    |
| <i>BjuHDA9</i>    | F: TCAACCGTCTGTTCCAGGGCTA    |
|                   | R: CCAGTCACCAGCAAAGGAATA     |
| <i>BjuAGL15</i>   | F: CAACACTTGCTTGGGCGACAT     |
|                   | R: CTTTGTGCGGTTGCTCTGGTC     |
| <i>BjuAGL18-1</i> | F: GGACCACCATTCTGACACTTC     |
|                   | R: GATTCGATCTTAGGCTTCTTTATC  |
| <i>BjuAGL24</i>   | F: TTGCGATGCTGATGTTGCTCT     |
|                   | R: CTGGTGATACGGAGAAGGTGG     |
| <i>BjuSVP</i>     | F: TGAAAGATACGGTGGTGGTGA     |
|                   | R: TAAGCCGAGCCTAAGGGAGAT     |

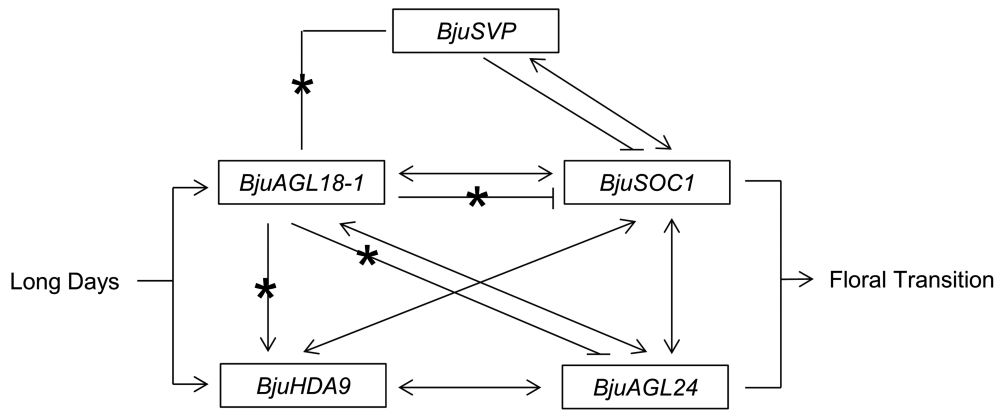

Figure S1. A proposed network between *BjuAGL18-1* and other components in regulating flowering of *B. juncea*. \* indicated work were finished in this study,  $\longleftrightarrow$  indicated interactions between two genes,  $\longrightarrow$  indicated promotion,  $\longrightarrow$  | indicated repression,  $\longrightarrow$  indicated neither promotion nor suppression.
